# Supplementary material
Source: HighWire-hosted journal article supplement (https://www.qdcxjkg.com/highwire/filestream/113561/field_highwire_adjunct_files/3/17_Borgmann1934.pdf)
Supplement: 17_Borgmann1934.pdf [file 17_Borgmann1934.pdf]

Reference no. 17 of

Winkelmann A, Noack T: The Clara cell – a 'Third Reich eponym'? *Eur Respir J* 2010; 36: 722–727

Borgmann R: Letter from the office of the Chief of Staff of SA [storm troopers], Munich, to the Dean of the Medical Faculty, Berlin, dated 14 March 1934. 1934. *Archive*: Universitätsarchiv der Humboldt-Universität, Berlin. *Signature*: UK PA Rudolf Fick, Nr. 40, Bd. 3, p. 44.

**Short comment by the authors:**

This letter demonstrates the activities of the NSDAP party administration, in this case of the SA (storm troopers), to influence the appointment procedures for the Chair of Anatomy of Berlin University. The author supports Max Clara's application and stresses that he has the scientific as well as the political qualifications for the position, making it very clear that the right "political attitude" (*Gesinnung*) should be an important factor. He also mentions Clara's brother, one of "our movement's old warriors" (*ein alter Kämpfer unserer Bewegung*).

The Chair of Anatomy in Berlin was eventually given to Hermann Stieve (who was not a member of the NSDAP).
